# Supplementary material
Source: PubMed Central journal article supplement (PMC1283425)
Supplement: pnas_0504682102_1.pdf [file pnas_0504682102_1.pdf]

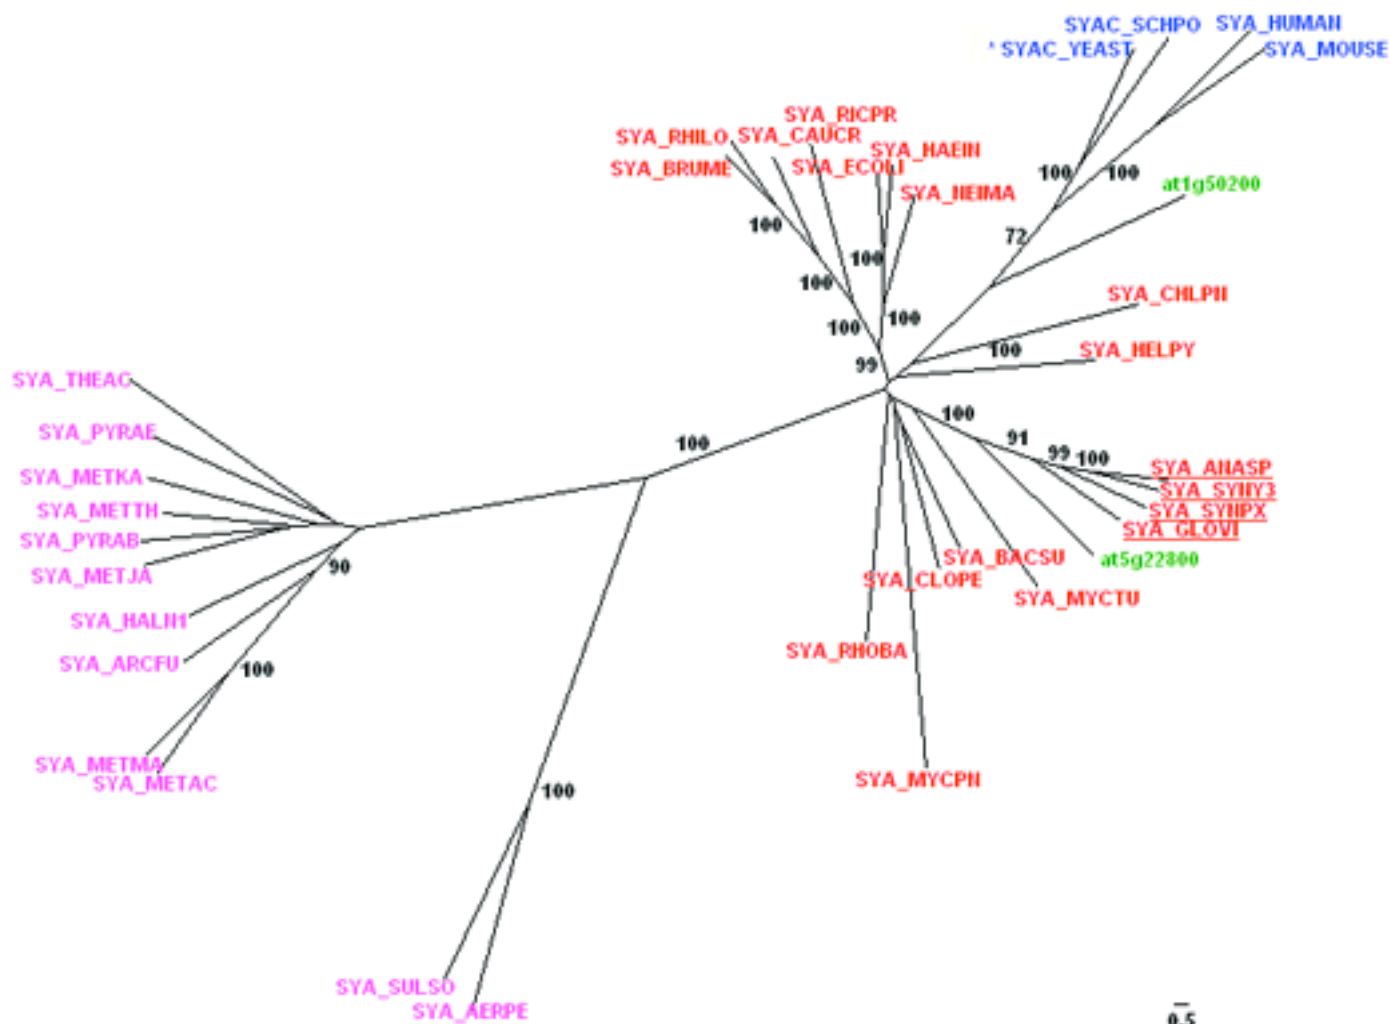

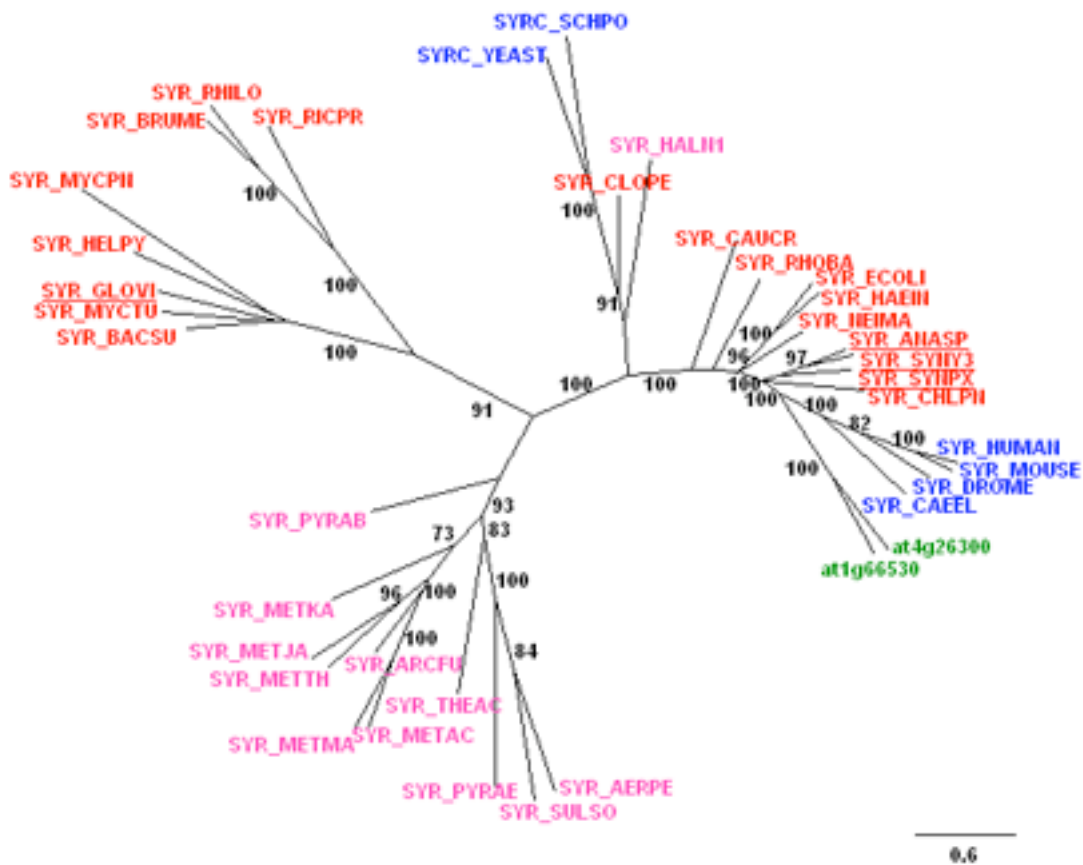

0.6

## Phylogenetic analysis of ArgRS sequences

Two representations of the phylogenetic tree are given

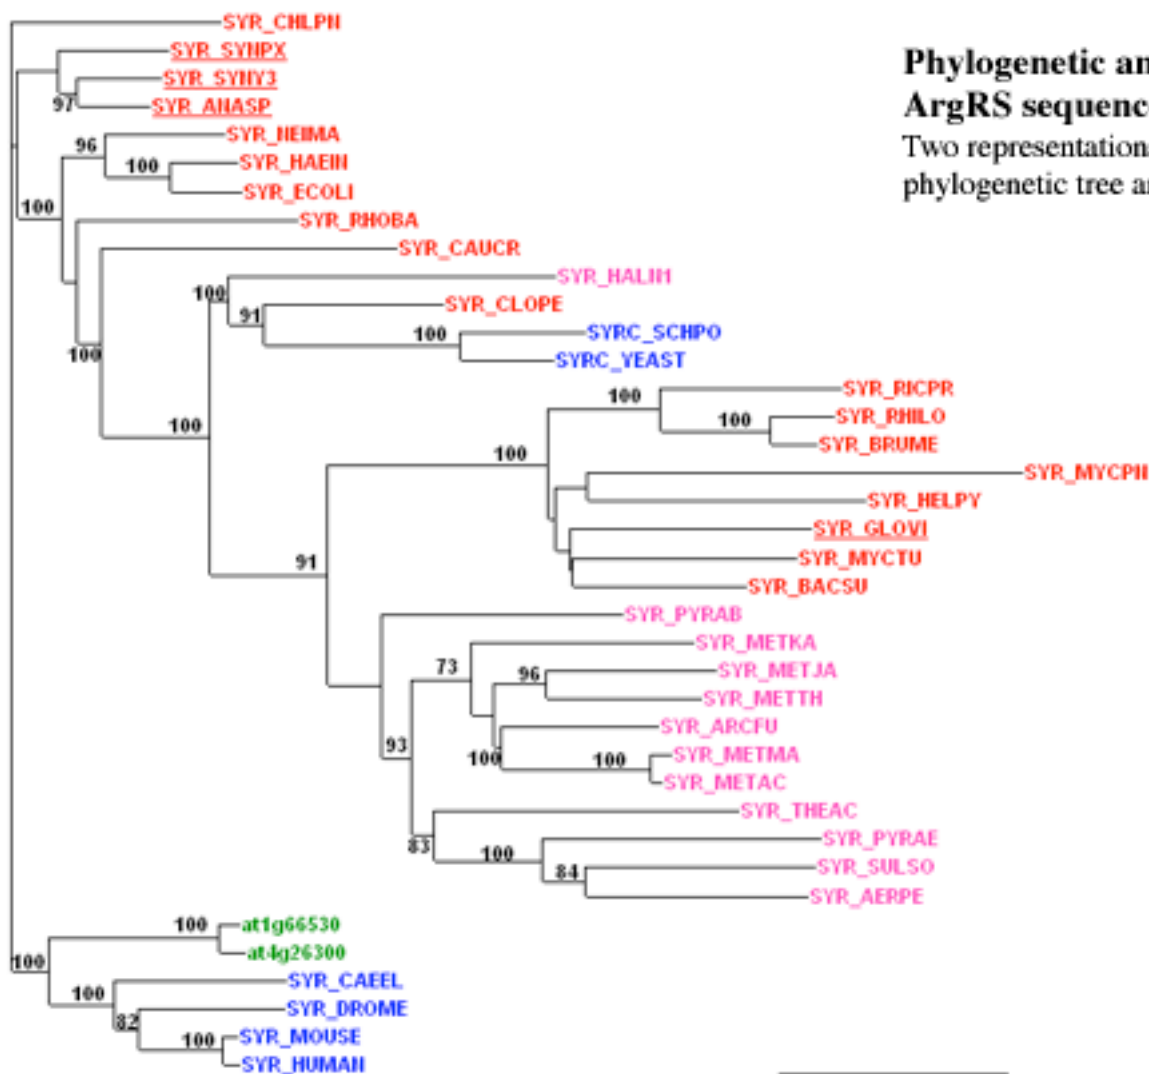

0.6

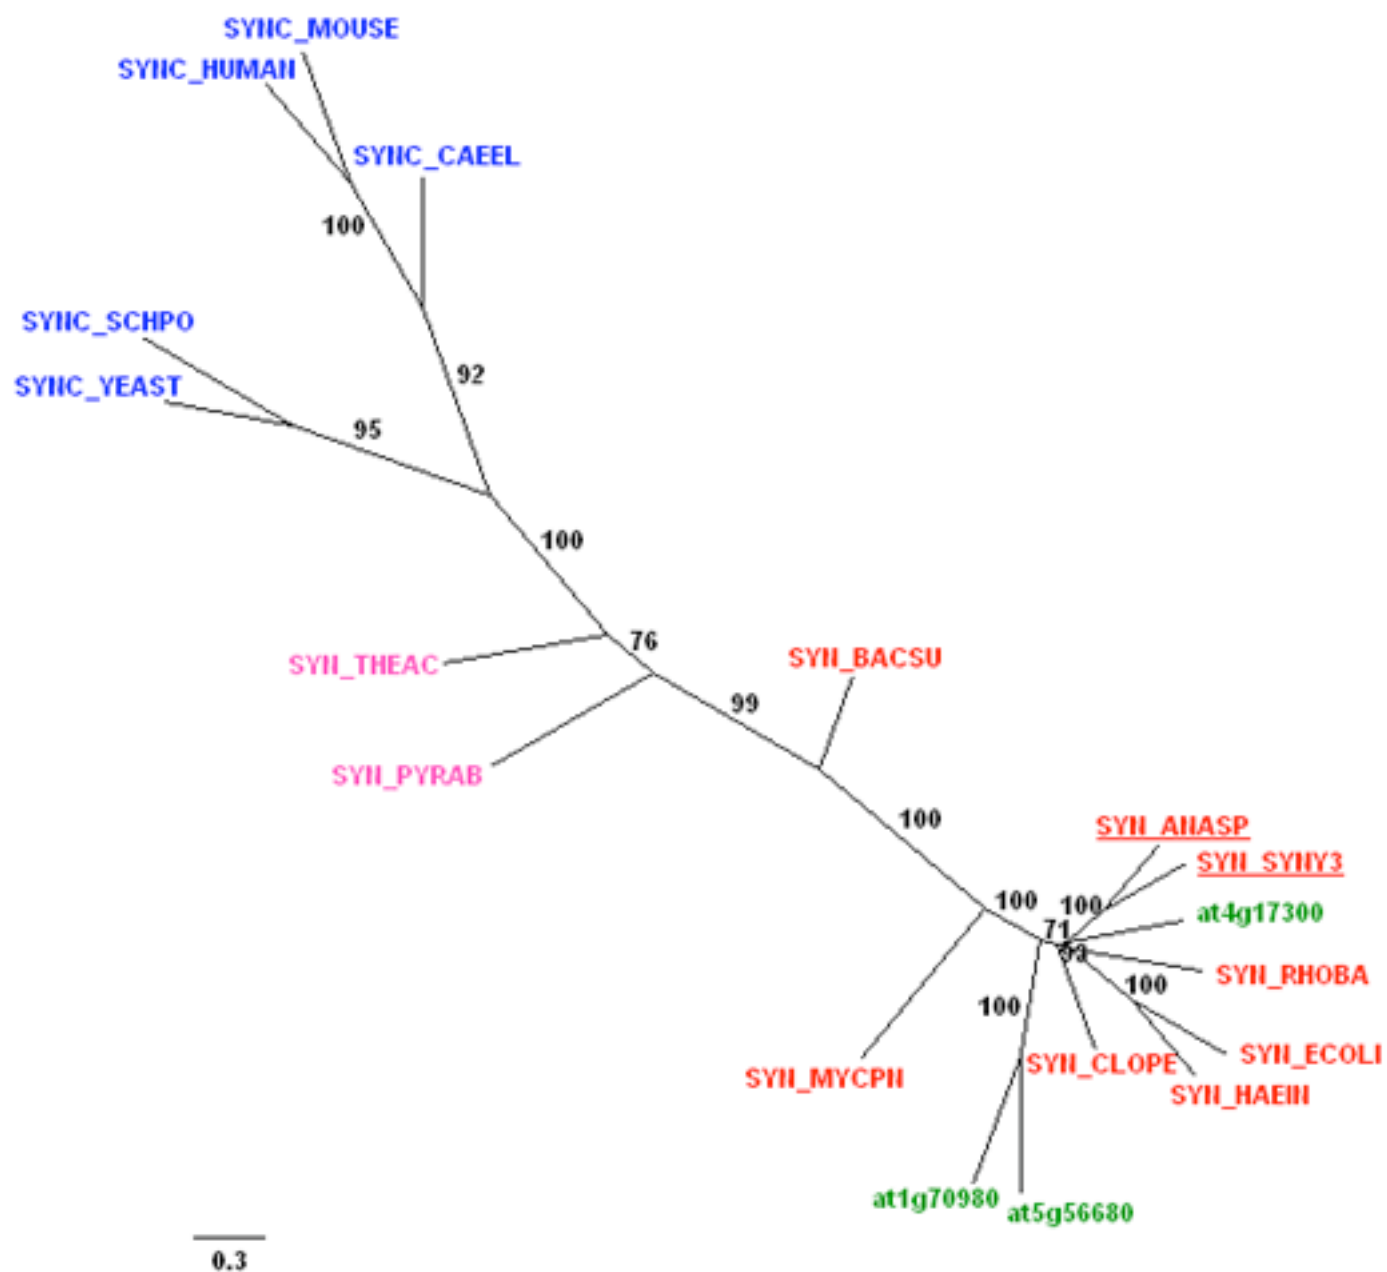

Phylogenetic analysis of AsnRS sequences



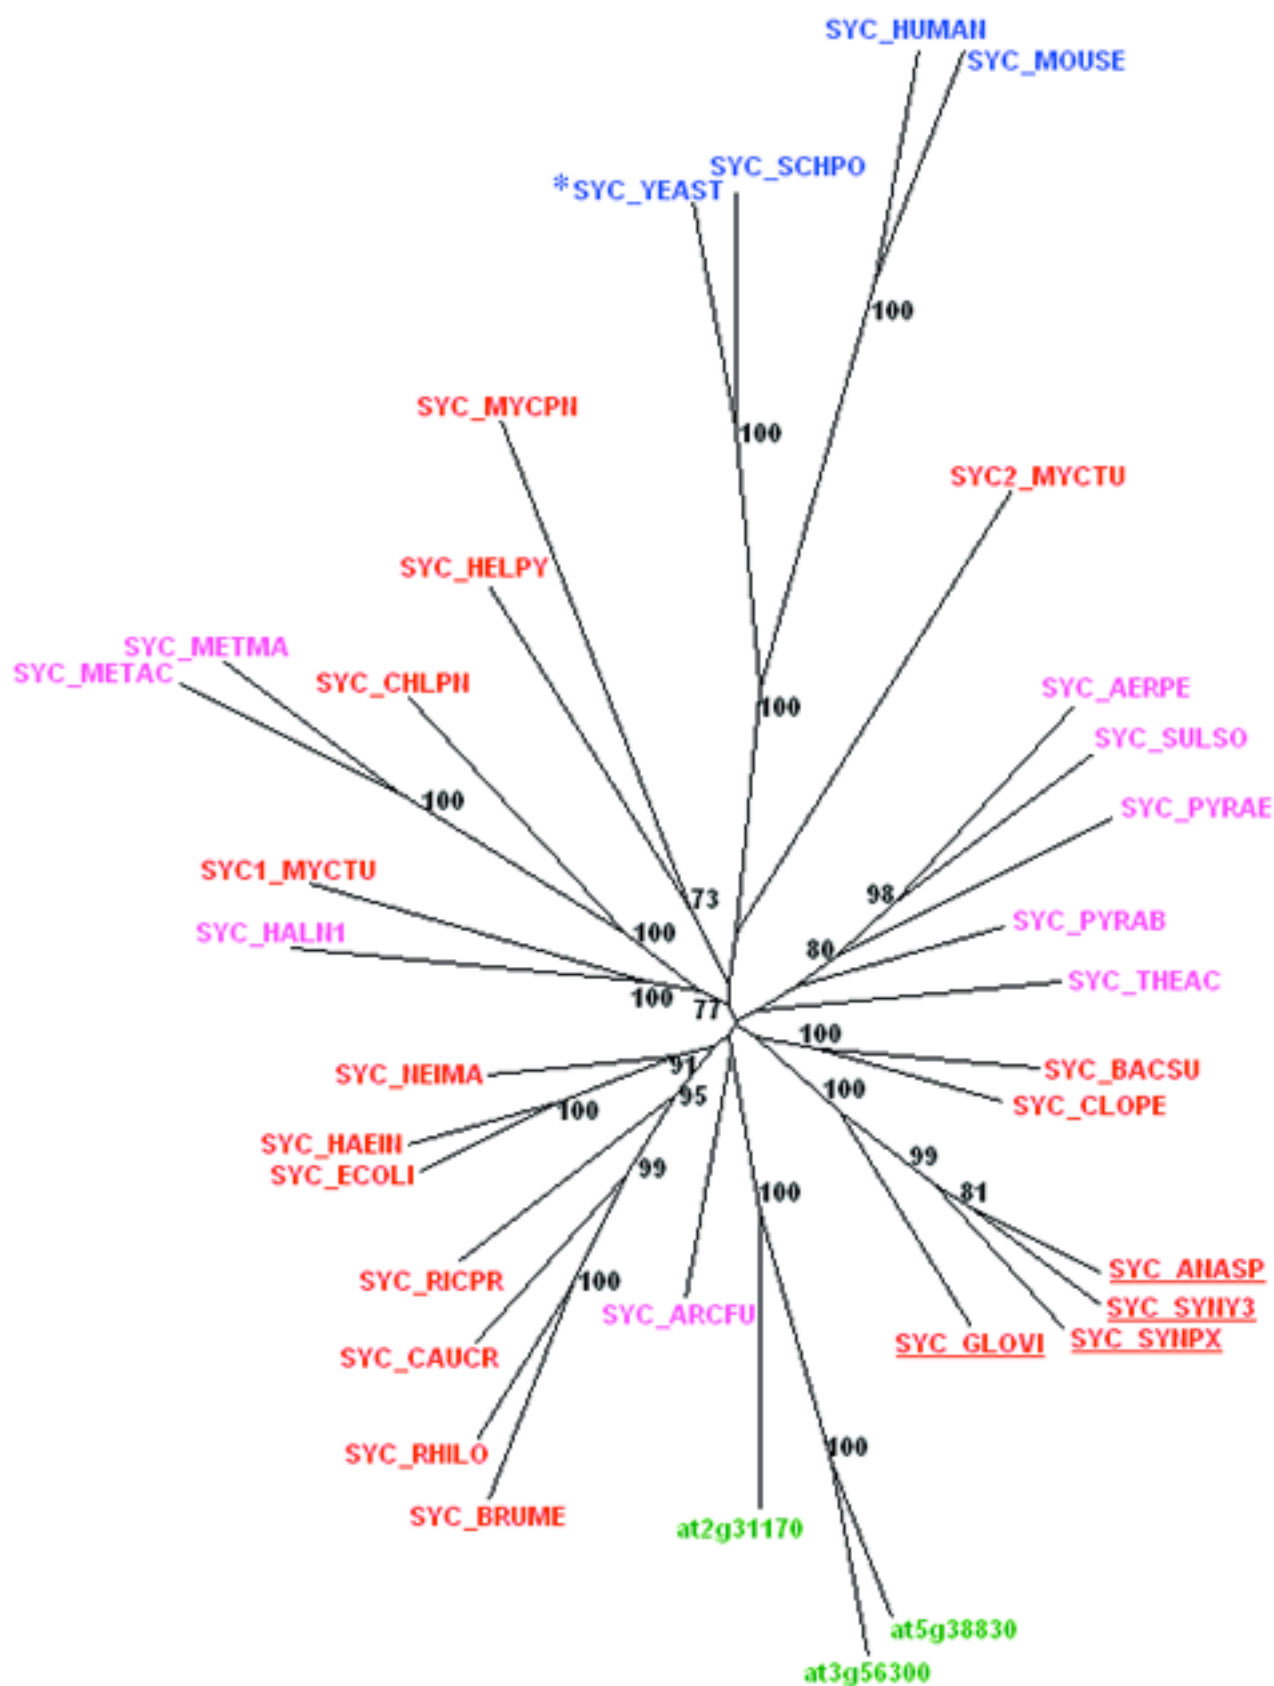

### Phylogenetic analysis of CysRS sequences

\* predicted to be also mitochondrial (<http://mips.gsf.de>)

0.5

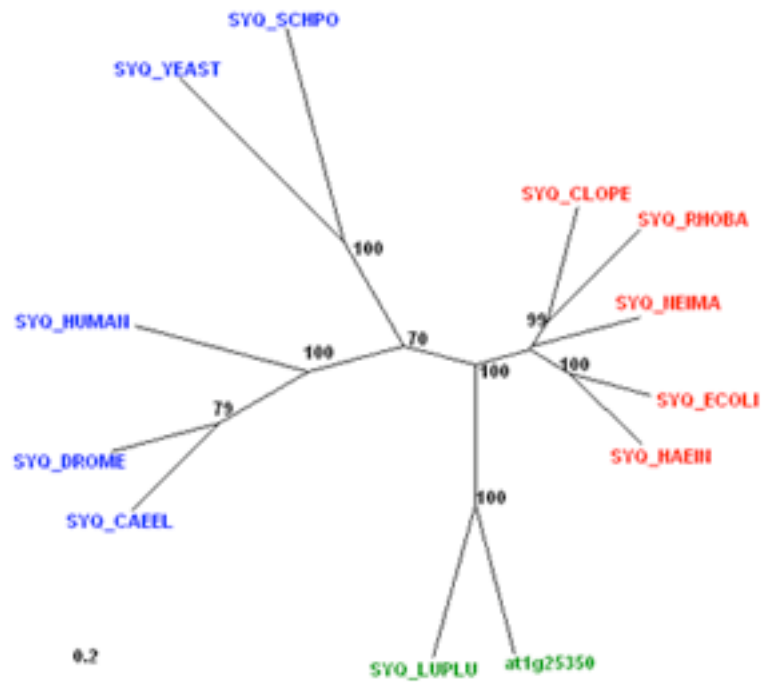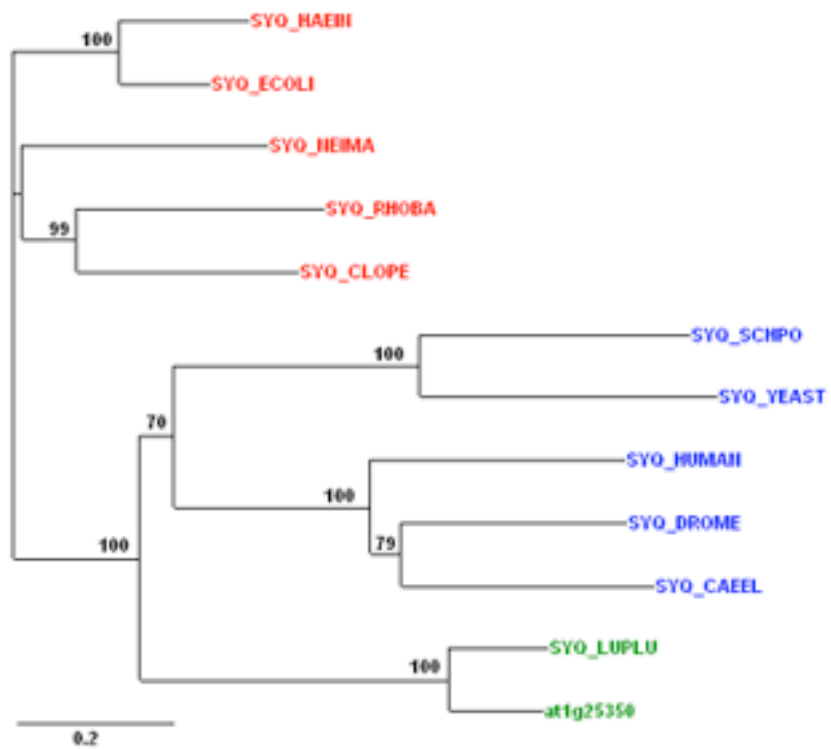

**Phylogenetic analysis of GlnRS sequences**  
Two representations of the phylogenetic tree are given

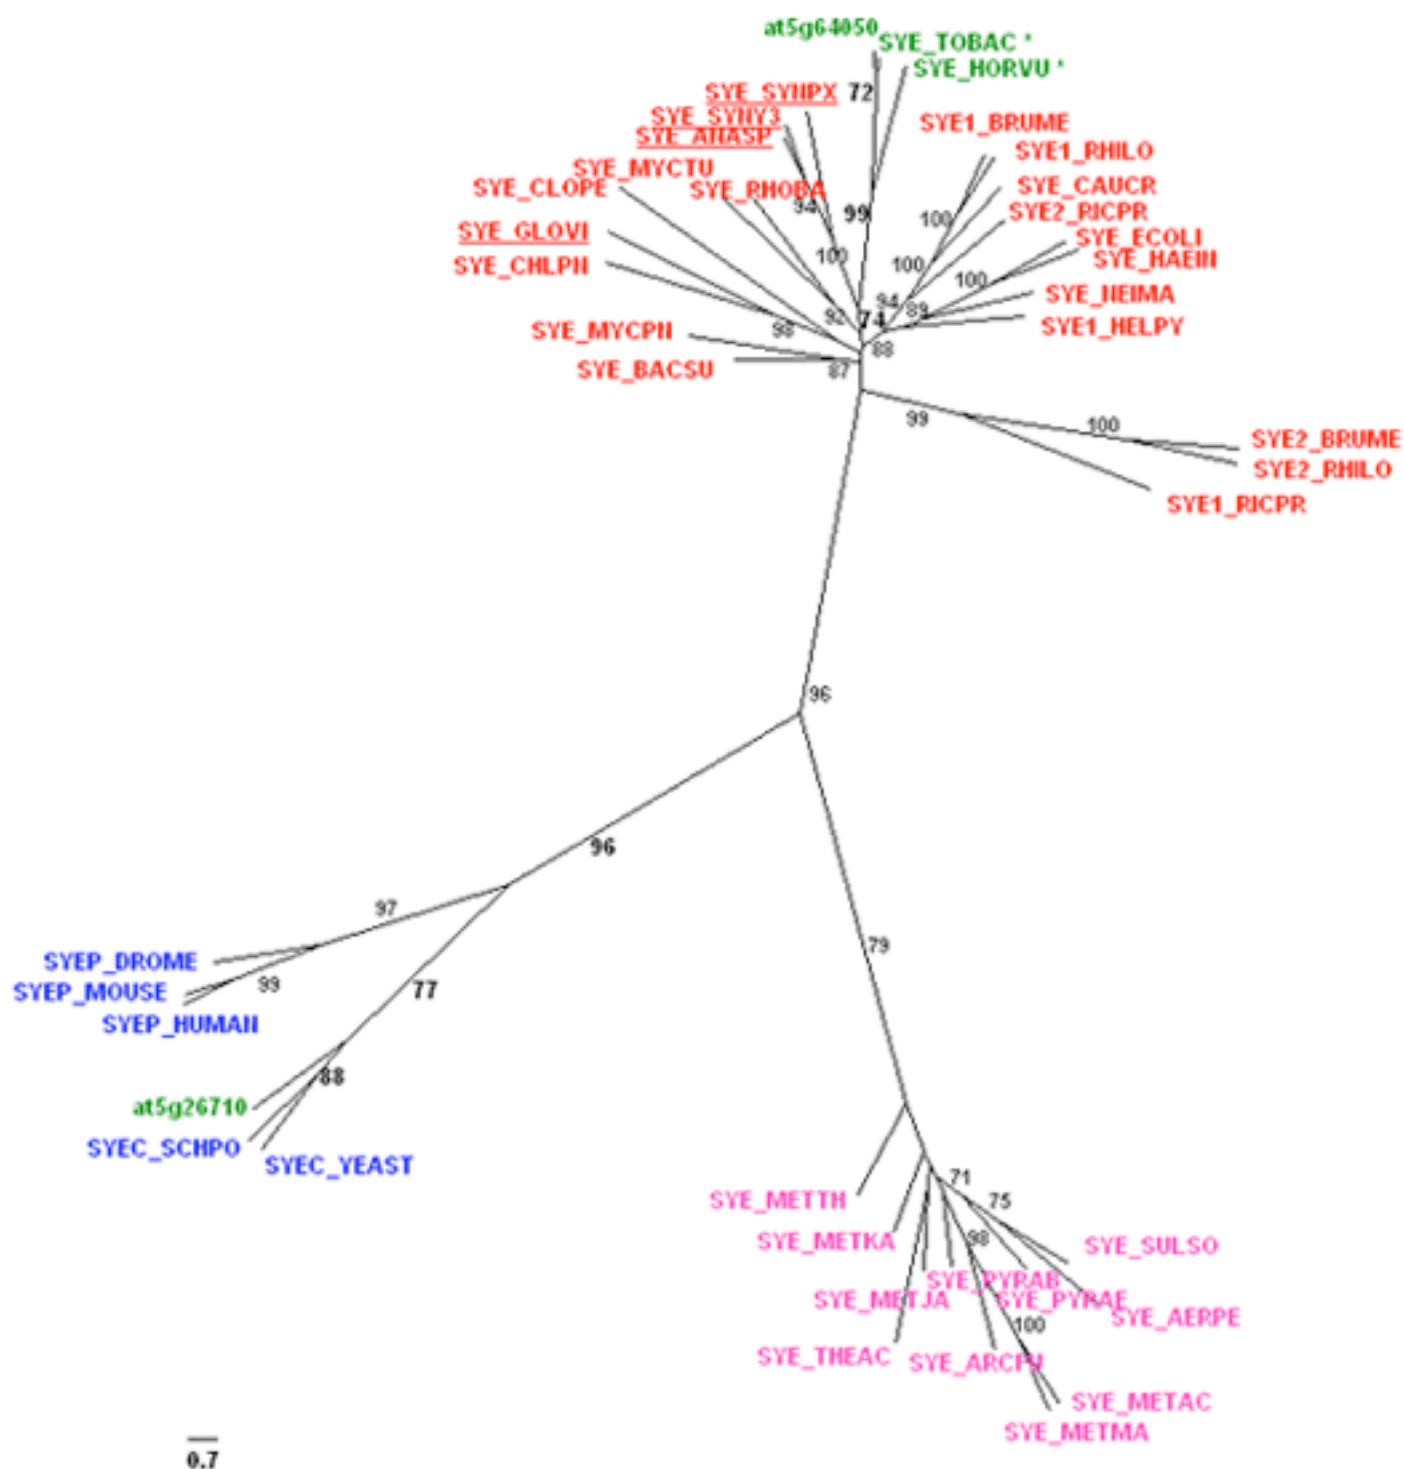

## Phylogenetic analysis of GluRS sequences

\* possibly mitochondrial and/or plastid

(<http://genoplante-info.infobiogen.fr/predotar/predotar.html>)

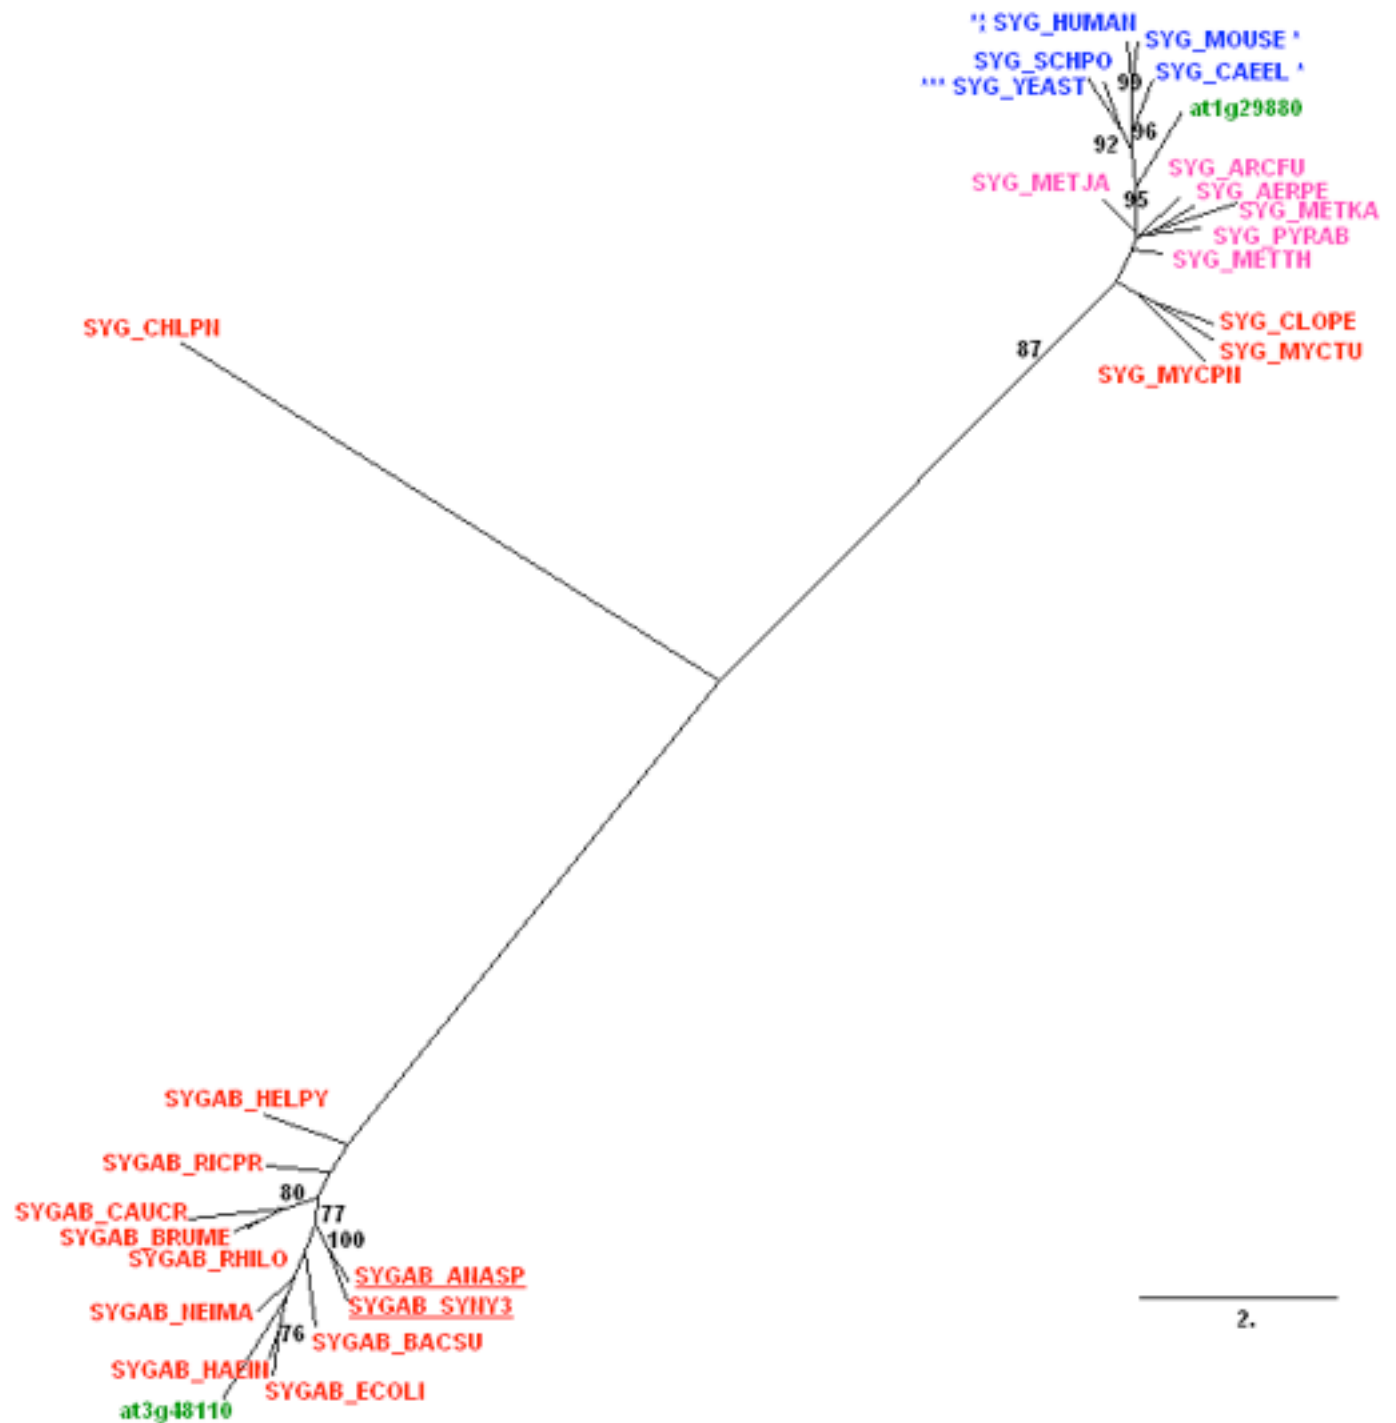

### Phylogenetic analysis of GlyRS sequences

In the case of eubacterial enzymes, the alpha and beta subunits were fused to make the alignments and phylogenetic analysis.

\* possibly mitochondrial (Predotar, TargetP)

\*\* the cytosolic and mitochondrial enzymes are encoded by the same gene (Shiba et al. J. Biol. Chem (1994) 269: 30049-30055)

\*\*\* predicted to be also mitochondrial (<http://mips.gsf.de>)





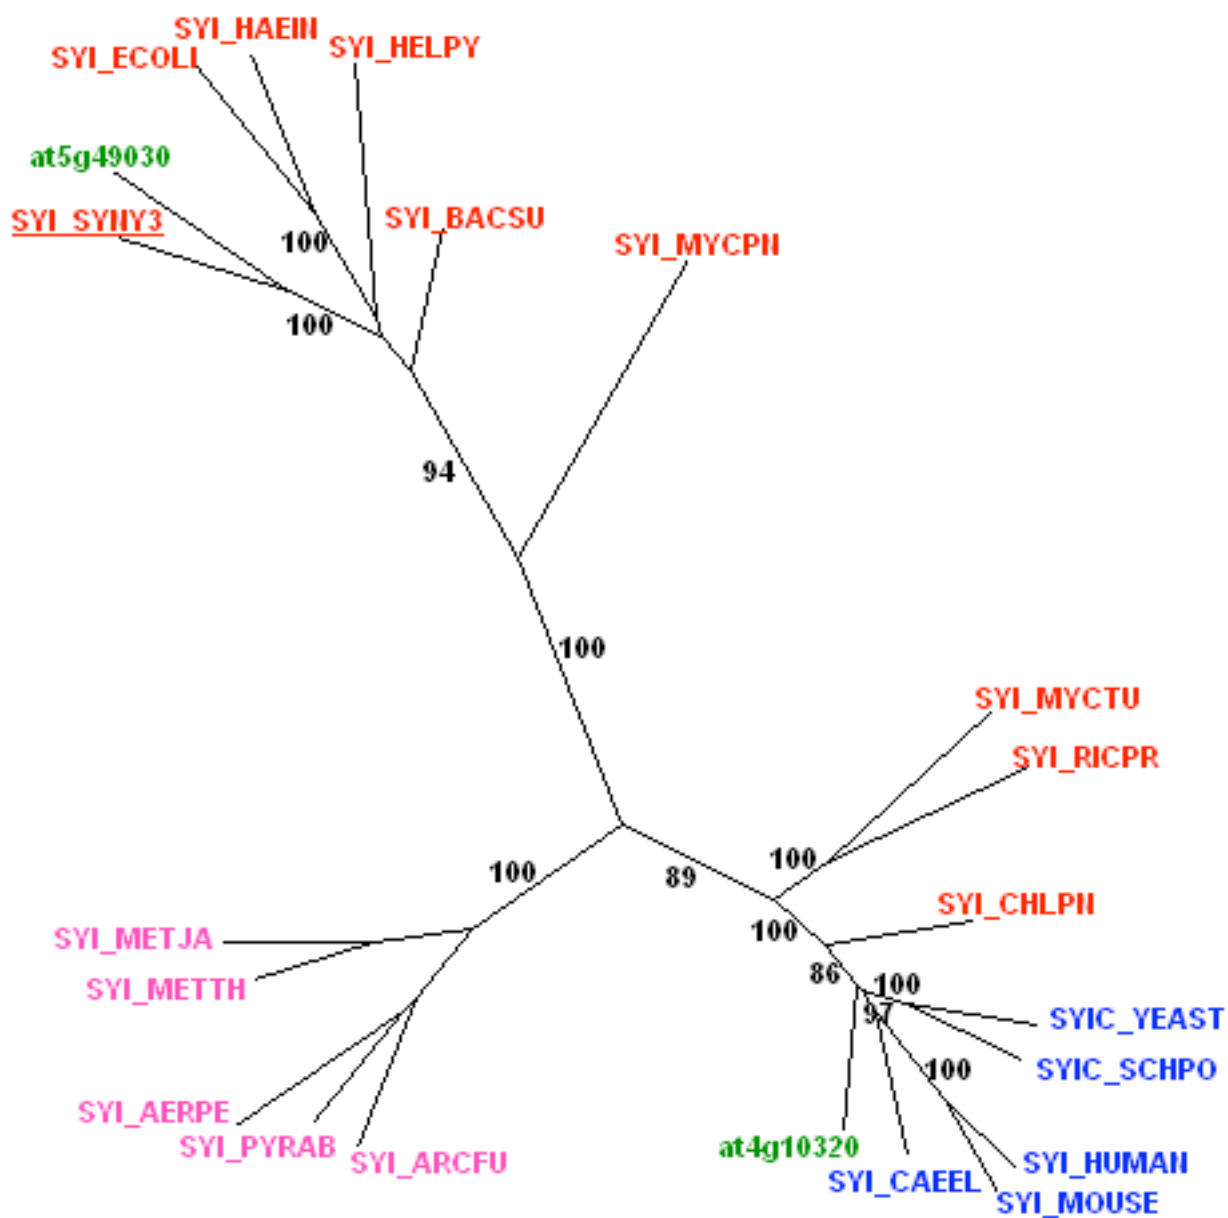

Phylogenetic analysis of IleRS sequences

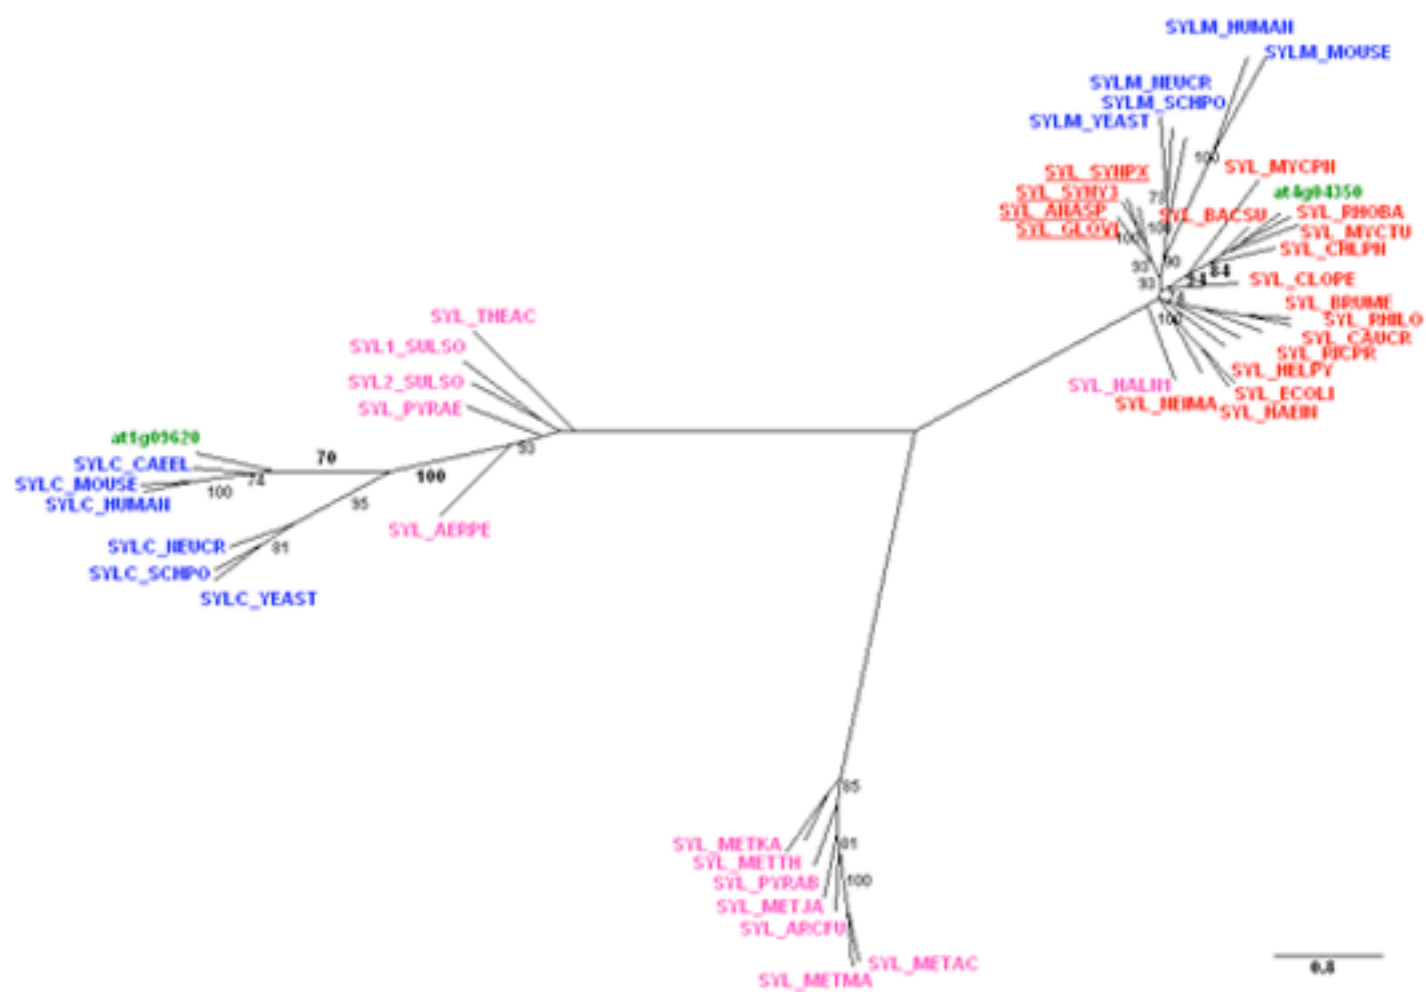

Phylogenetic analysis of LeuRS sequences

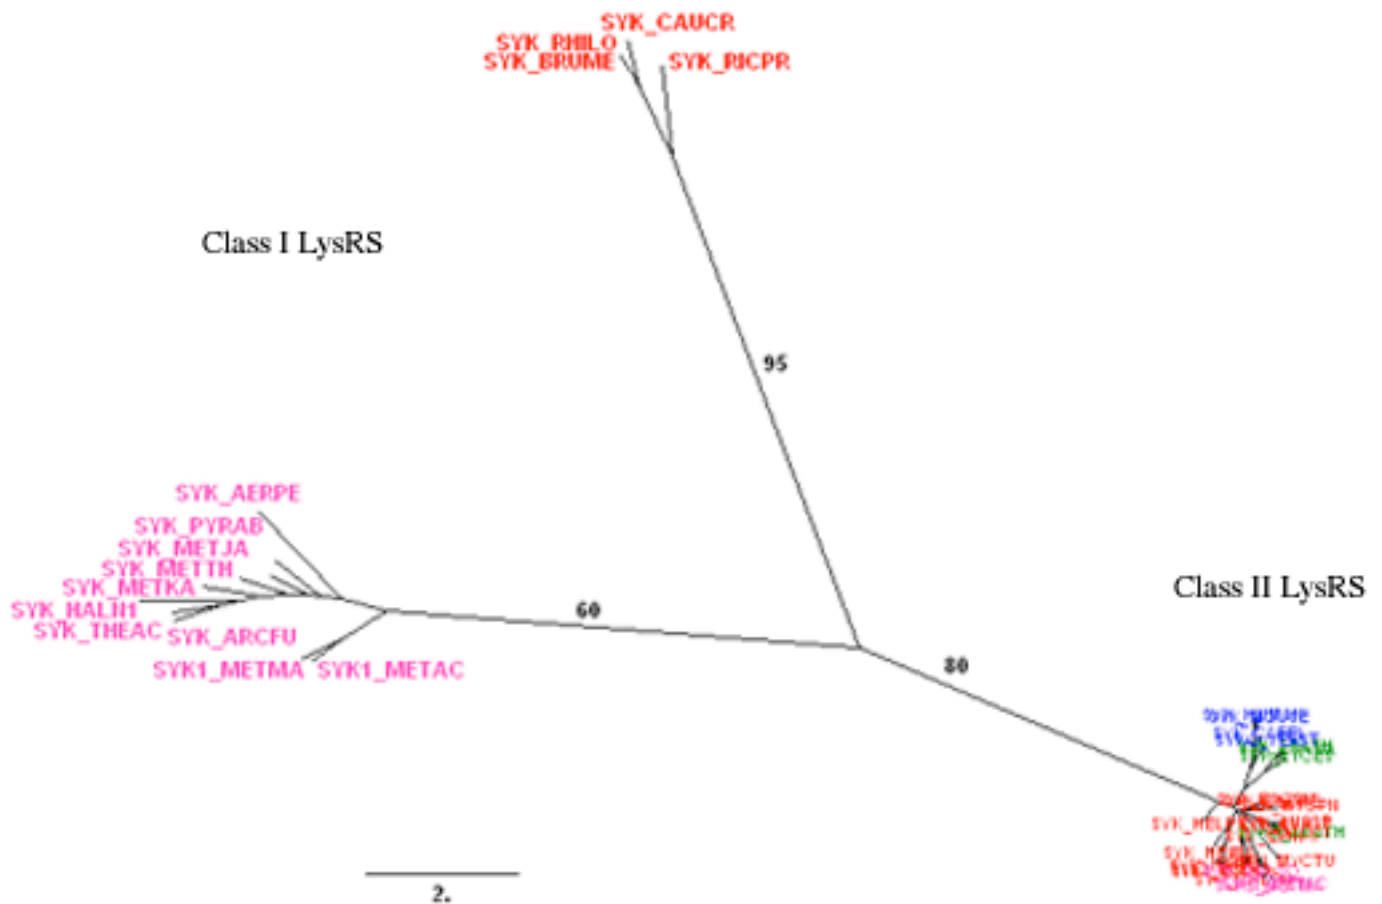

### Phylogenetic analysis of LysRS sequences

\*\* The cytosolic and mitochondrial enzymes are encoded by the same gene (Tolkunova et al. J. Biol. Chem. (2000) 275: 16820-16826)

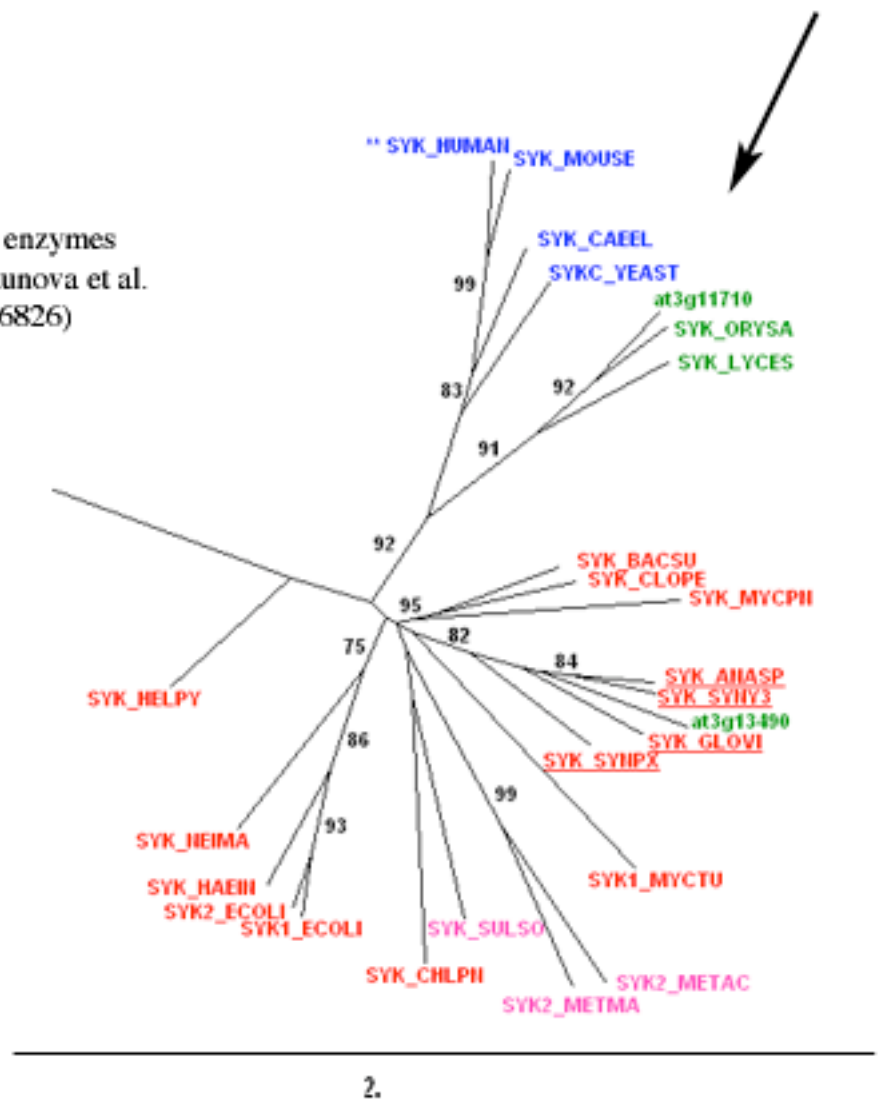

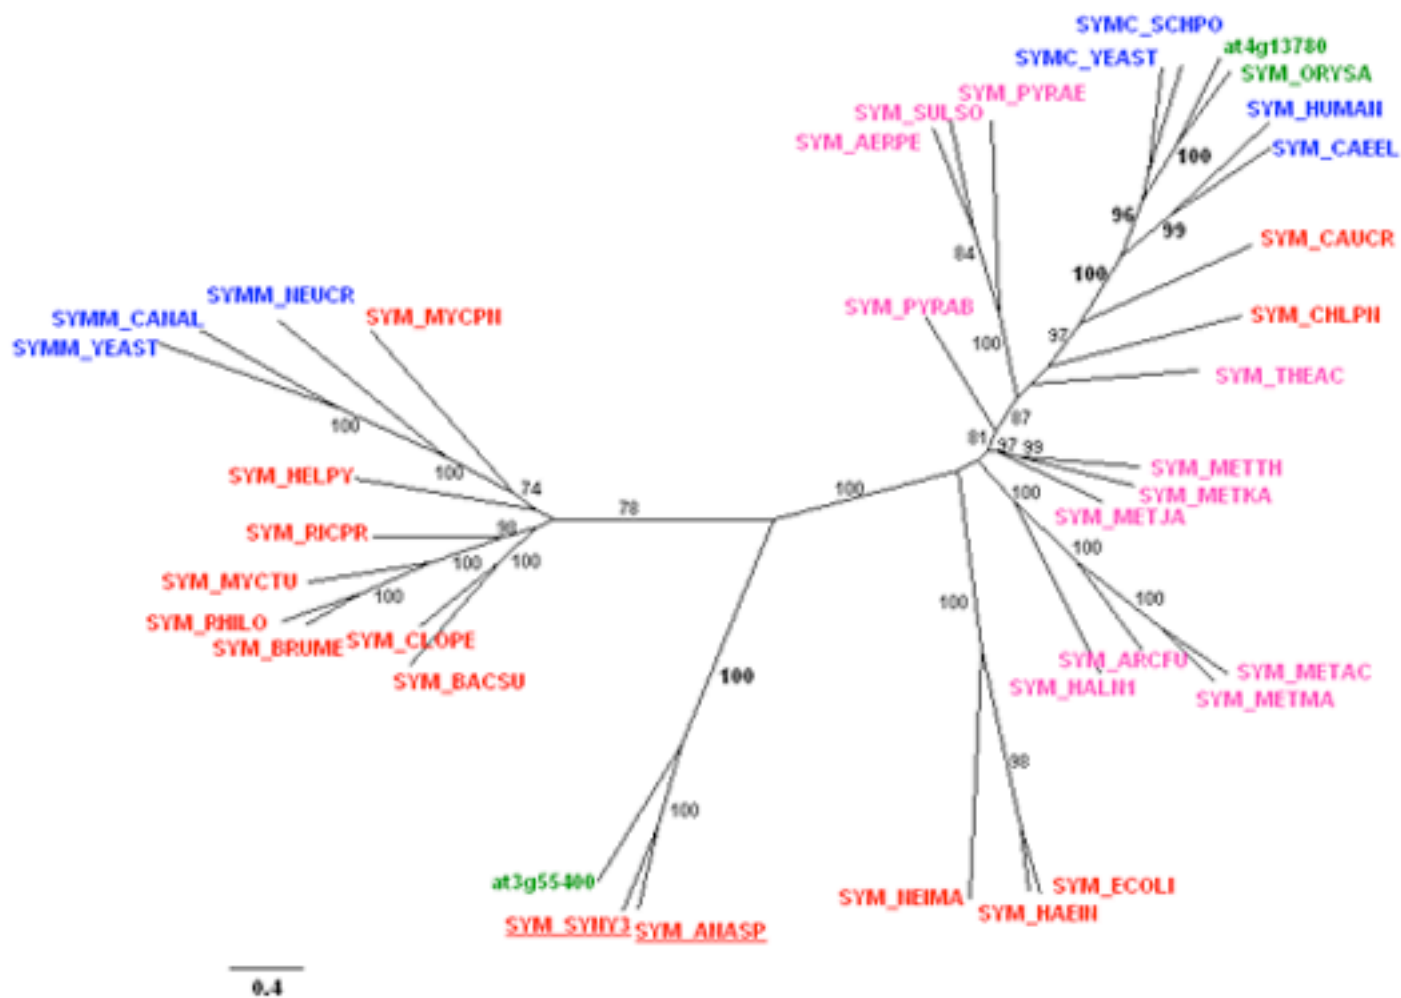

Phylogenetic analysis of MetRS sequences

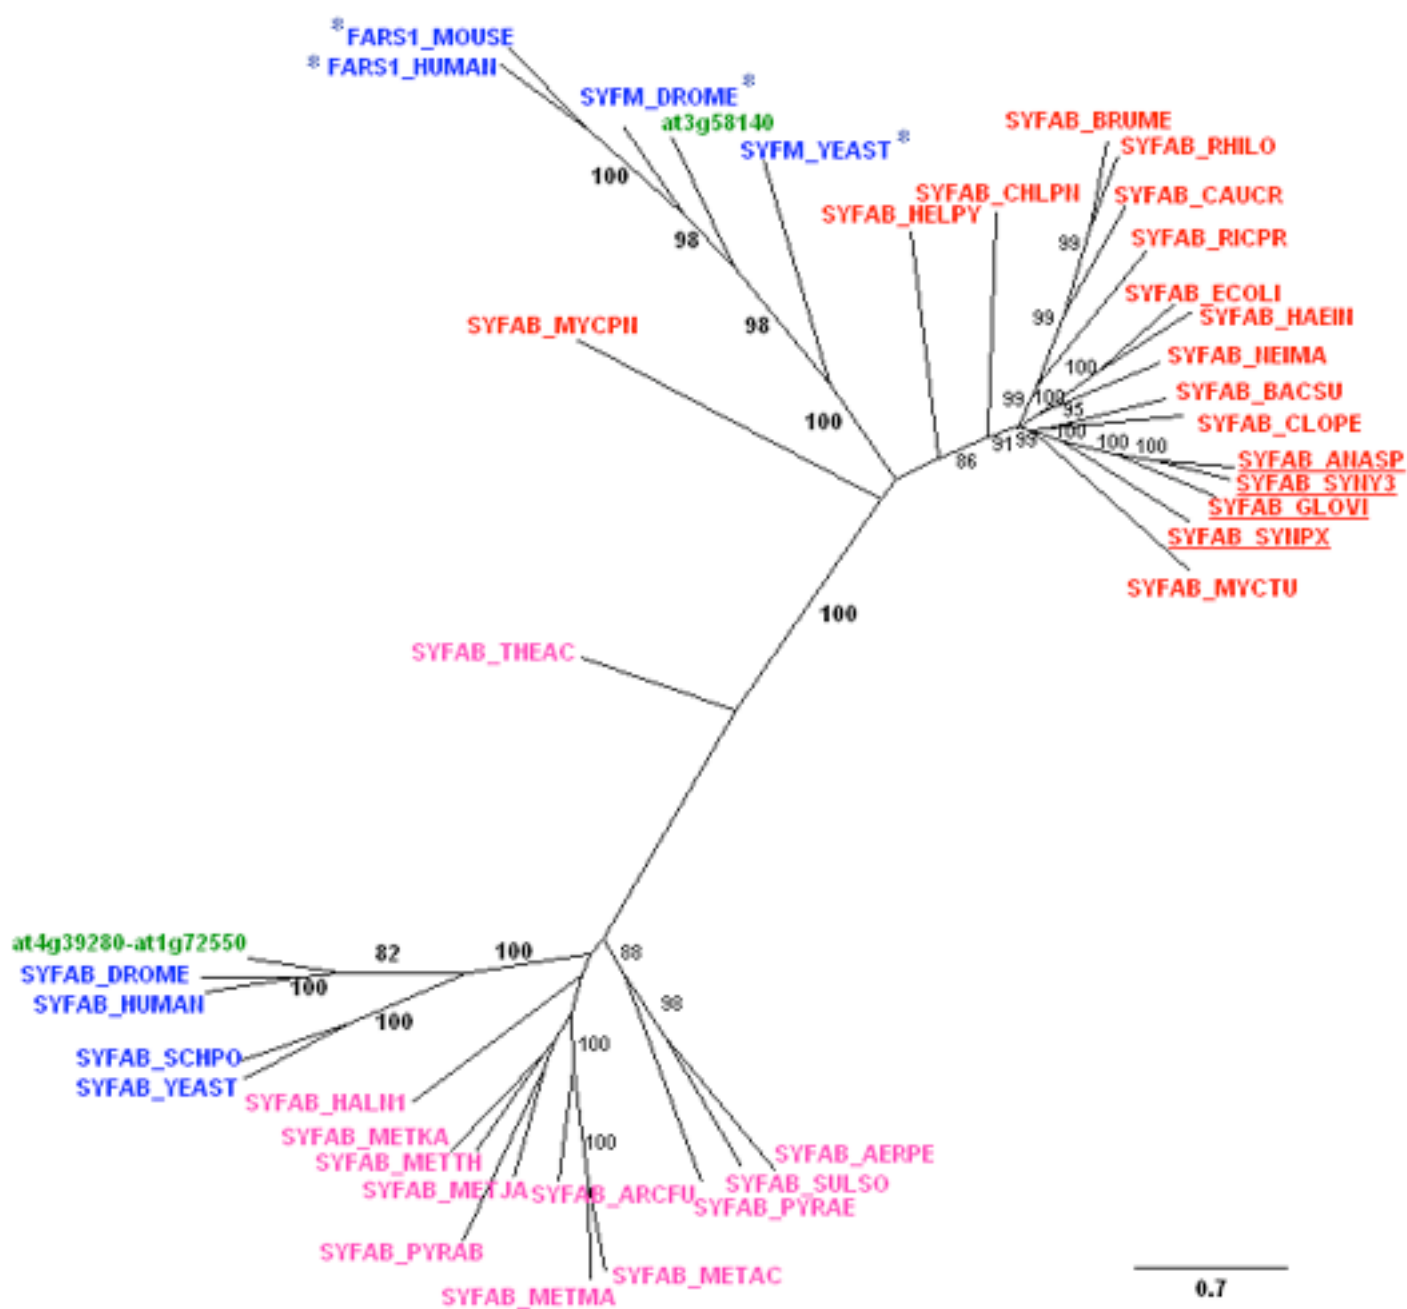

## Phylogenetic analysis of PheRS sequences

The alpha and beta chains were fused to make the alignments

\* predicted to be mitochondrial (<http://mips.gsf.de> or <http://www.expasy.org>)

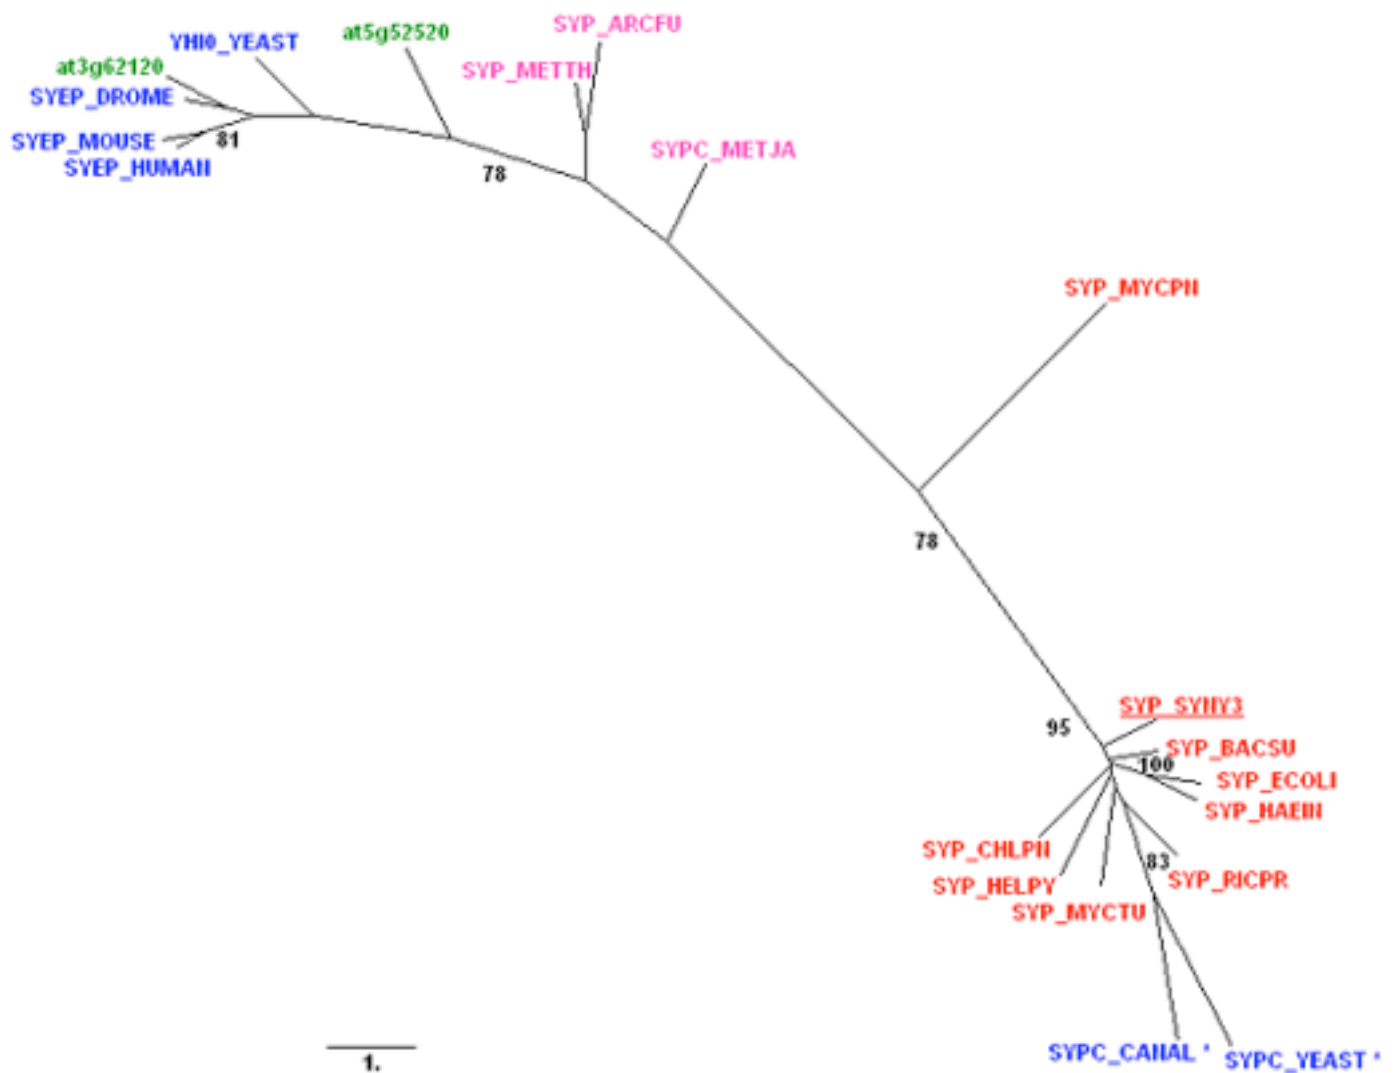

### Phylogenetic analysis of ProRS sequences

\* possibly mitochondrial (Predotar and/or TargetP)

For SYEP\_HUMAN, SYEP\_DROME and SYEP\_MOUSE, the part of sequence corresponding to the GluRS was removed (about 800 first aminoacids) prior to alignments and phylogenetic analysis.

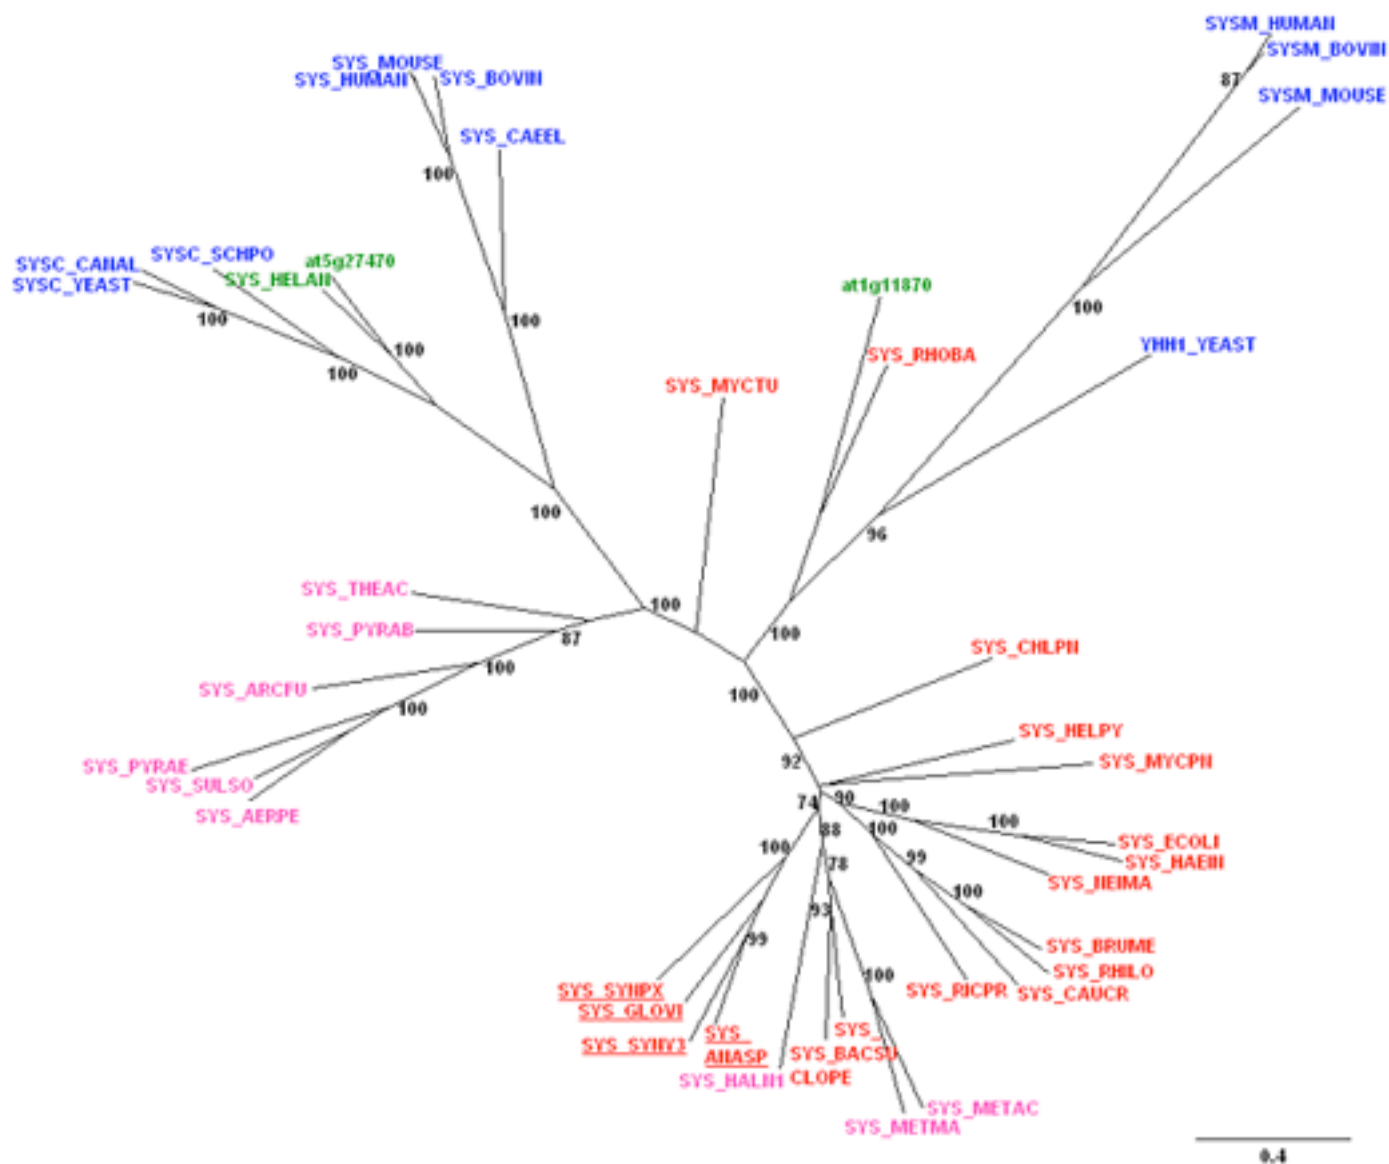

**Phylogenetic analysis of SerRS sequences**



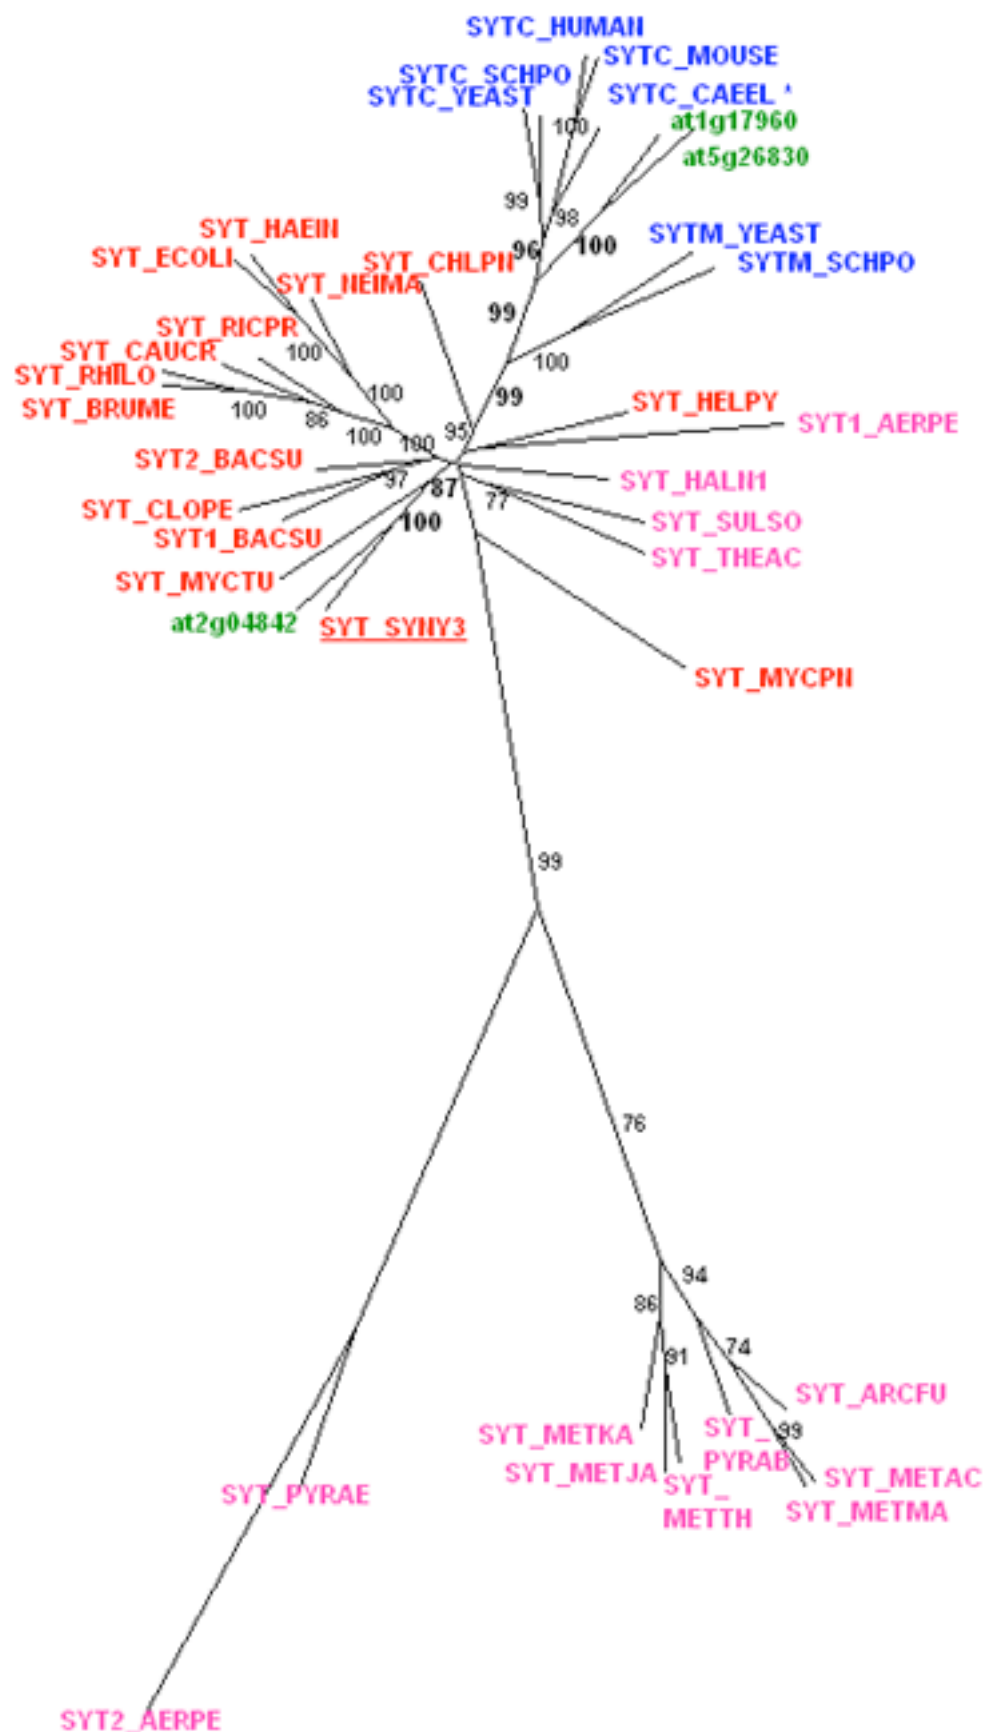

**Phylogenetic analysis of ThrRS sequences**  
 \* possibly mitochondrial (Predotar and/or TargetP)

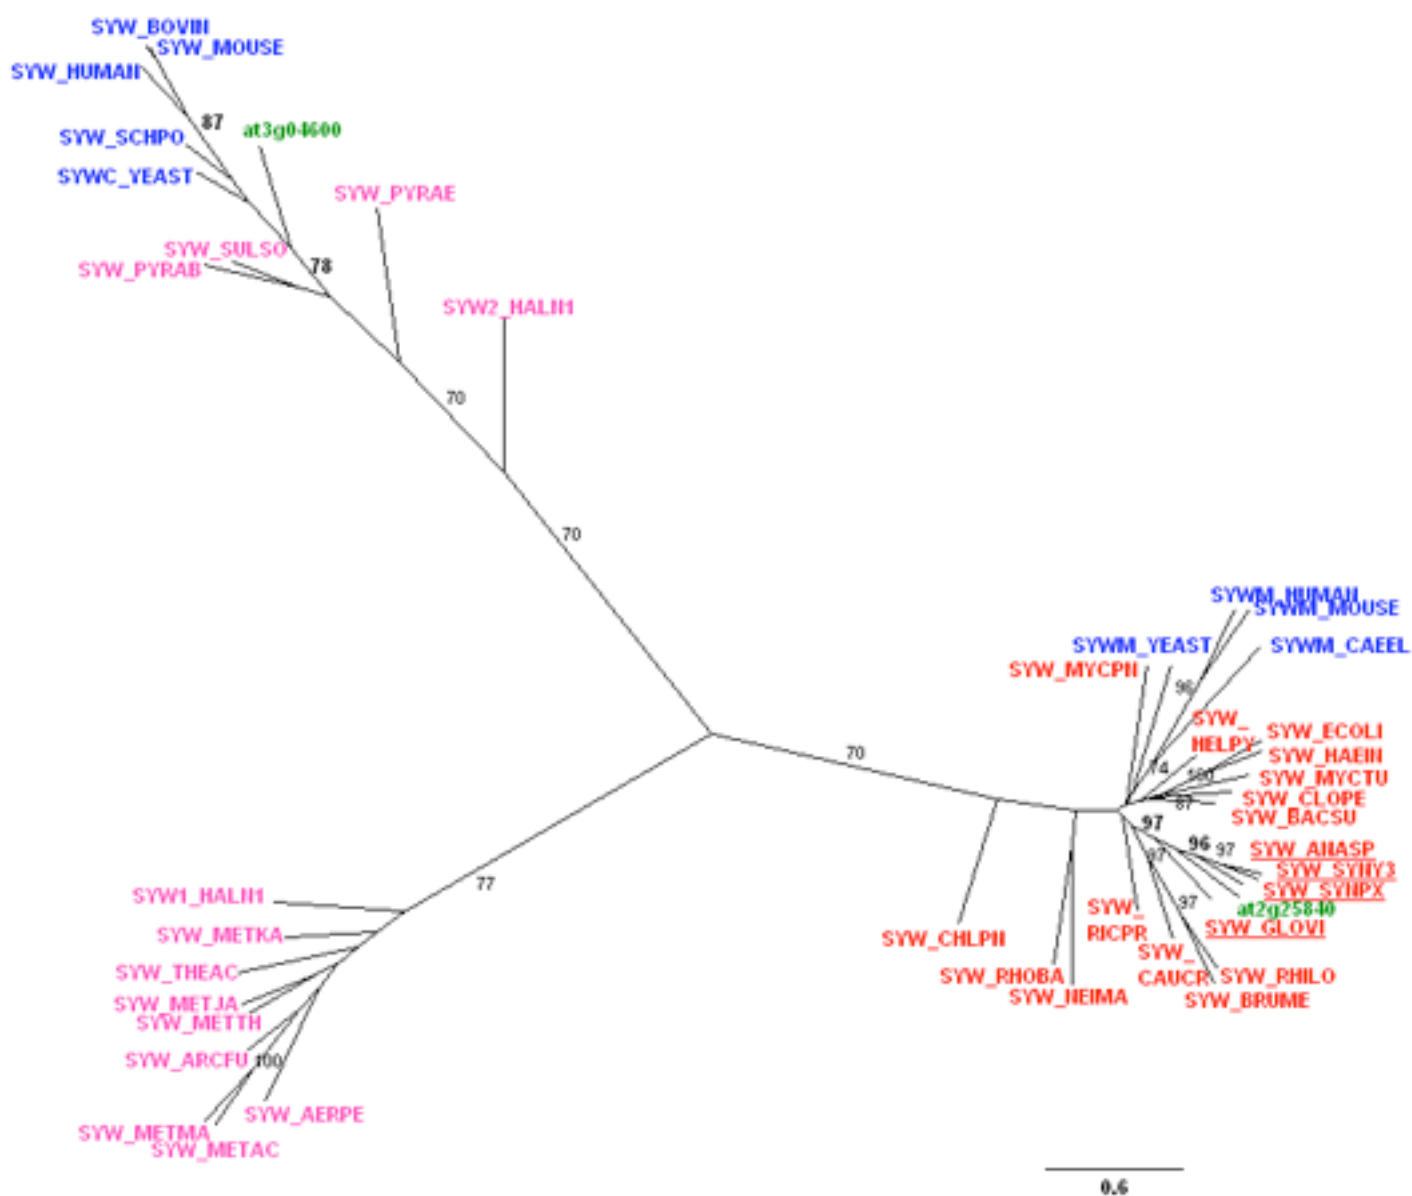

Phylogenetic analysis of TrpRS sequences



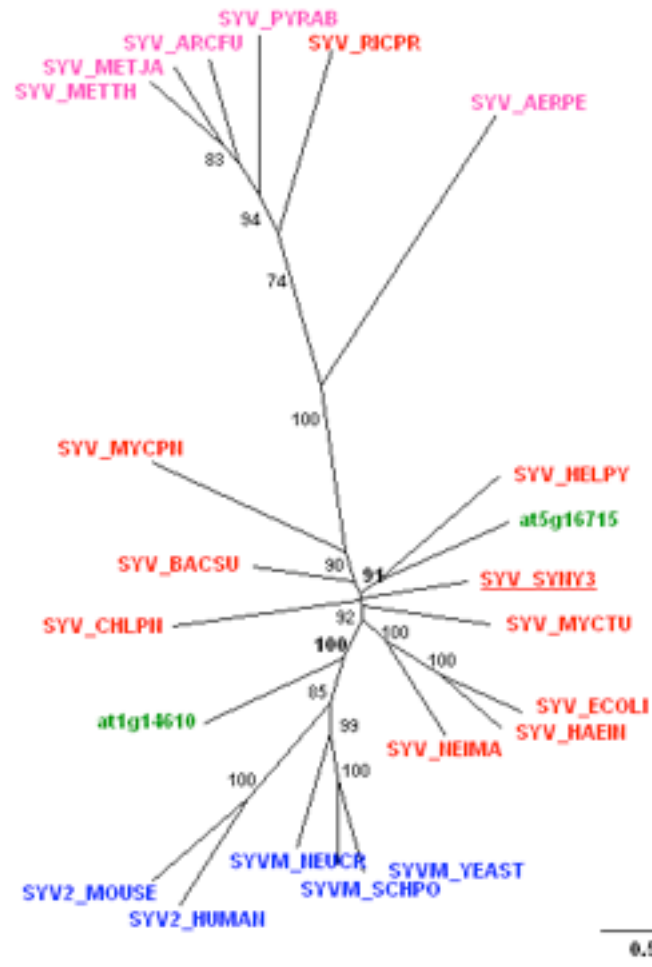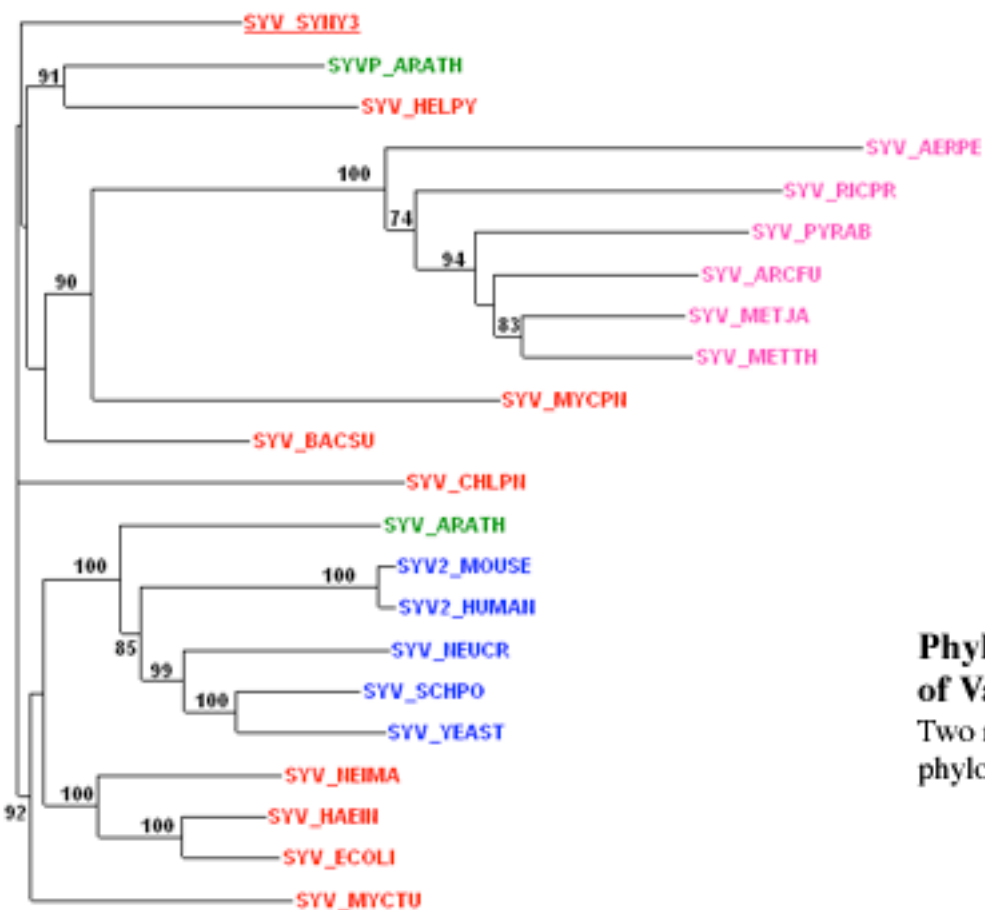

**Phylogenetic analysis of ValRS sequences**  
 Two representations of the phylogenetic tree are given
